# Supplementary material for: Studies on the transcriptional regulation of the HBV pregenomic promoter and the human p53 tumor suppressor gene by the hepatitis B viral core protein
Source: Springer Nature journal article supplement (doi:10.1007/s00108-020-00814-z), 2002-01-01
Supplement: MOESM1 [file 18020016]

**Tabelle S1: Überblick über aktuell publizierte Fallberichte und Studien (Auswahl) zur klinischen Evaluation von Vakzinierungsansätzen**

Die einzelnen Vakzinierungsansätze sind gruppiert nach der eingesetzten Plattform und innerhalb dessen sortiert nach Erscheinungsdatum der entsprechenden Publikation.

Abkürzungen: APVAC: active personalized vaccine; CEA: Carcino-embryonales Antigen; CpG: cytosine-guanosine; CRPC: castration resistant prostate cancer; DZ: Dendritische Zellen; GM-CSF: Granulocyte-monocyte Colony Stimulating Factor; gp: glykoprotein; HER: human epidermal growth factor receptor; HLA: humanes Leukozytenantigen; HPV: humane Papillomaviren; ICI: Immun Checkpoint Inhibitor; ICLC: polyinosinic and polycytidylic acid; IFN: Interferon; IL: Interleukin; MAGE: melanoma associated antigen; MART: melanoma-associated antigen recognized by T cells; MUC: mucin; n.a.: nicht anwendbar; NEJM: New England Journal of Medicine; NY-ESO: New York esophageal; NZK: Nierenzellkarzinom; PDAC: pancreatic ductal adenocarcinoma; VIN: vulvar intraepithelial neoplasia; WT: Wilm's tumor.

Anmerkungen:

<sup>1</sup> Aminosäuresequenz der Vakzinierungsantigene: „Wildtyp“ bedeutet, dass die Sequenz der Wildtyp-Sequenz entspricht; „mutiert“ bedeutet, dass die Aminosäuresequenz eine tumor-spezifische Mutation repräsentiert (mutiertes Neoantigen); „modifiziert“ bedeutet, dass in der Aminosäuresequenz Ankeramino-säuren ausgetauscht sind.

| Plattform                      | Vakzine                                           | Antigen(e)                                    | Sequenz <sup>1</sup> | Begleittherapie/<br>Adjuvanz  | Applikation | Klinische<br>Phase | Klinisches<br>Setting | Patienten<br>(n = ) | Erkrankung            | Immunologisches<br>Ansprechen | Klinisches<br>Ansprechen  | Referenz                                           |
|--------------------------------|---------------------------------------------------|-----------------------------------------------|----------------------|-------------------------------|-------------|--------------------|-----------------------|---------------------|-----------------------|-------------------------------|---------------------------|----------------------------------------------------|
| <b>Peptid-<br/>gepulste DZ</b> | standardisiert                                    | NY-ESO1, MAGE-C2,<br>MUC1                     | Wildtyp              | Protamin/ RNS                 | intranodal  | IIa                | palliativ             | 21                  | Prostata-<br>karzinom | positiv                       | positiv                   | Westdorp et al.,<br>J Immunother<br>Cancer 2019    |
|                                | standardisiert                                    | MART1, MAGE-A6                                | Wildtyp              | ±IFNα                         | intradermal | I                  | palliativ             | 35                  | Melanom               | positiv                       | schwach                   | Butterfield et al.,<br>J Immunother<br>Cancer 2019 |
|                                | standardisiert                                    | WT1                                           | Wildtyp              | Gemcitabin                    | intradermal | I                  | palliativ             | 7                   | PDAC                  | positiv                       | positiv                   | Ito et al.,<br>Oncology 2019                       |
| <b>kurze Peptide</b>           | standardisiert                                    | prädefiniert, Cocktail<br>IMA-901             | Wildtyp              | Cyclophosphamid               | intradermal | I<br>II            | palliativ             | 20<br>68            | NZK                   | positiv                       | positiv                   | Walter et al.,<br>Nat Med 2012                     |
|                                | standardisiert                                    | prädefiniert, Cocktail<br>IMA-901             | Wildtyp              | Sunitinib,<br>Cyclophosphamid | intradermal | III                | palliativ             | 339                 | NZK                   | negativ                       | negativ                   | Rini et al.,<br>Lancet Oncol 2016                  |
|                                | standardisiert                                    | Survivin 2B                                   | Wildtyp              | Montanide (±IFNβ)             | subkutan    | II                 | palliativ             | 83                  | PDAC                  | positiv                       | schwach                   | Shima et al.,<br>Cancer Sci 2019                   |
|                                | standardisiert                                    | Warenhaus-Konzept                             | Wildtyp              | GM-CSF,<br>Montanide          | intradermal | I/II               | palliativ             | 19                  | NZK                   | positiv                       | positiv                   | Rausch et al.,<br>Eur Urol Focus 2019              |
|                                | adaptiert<br>(APVAC1),<br>individuell<br>(APVAC2) | Warenhaus-Konzept,<br>vollständig individuell | Wildtyp, mutiert     | GM-CSF,<br>poly-ICLC          | intradermal | I/II               | palliativ             | 15                  | Glioblastom           | positiv                       | fragl. positiv            | Hilf et al.,<br>Nature 2019                        |
|                                | standardisiert                                    | HER2                                          | Wildtyp              | GM-CSF                        | intradermal | I/II               | adjuvant              | 182                 | Mamma-<br>karzinom    | n.a.                          | positiv                   | Mittendorf et al.,<br>Cancer 2012                  |
|                                | adaptiert                                         | Warenhaus-Konzept                             | Wildtyp              | Montanide                     | subkutan    | II                 | palliativ             | 42                  | Prostata-<br>karzinom | positiv                       | positiv                   | Noguchi et al.,<br>Prostate 2012                   |
|                                | standardisiert                                    | gp100                                         | modifiziert          | Ipilimumab,<br>Montanide      | subkutan    | III                | palliativ             | 676                 | Melanom               | n.a.                          | positiv (nur ICI<br>mono) | Hodi et al.,<br>NEJM 2010                          |

|                             |                |                                                |                  |               |             |      |           |     |         |         |                              |                                               |
|-----------------------------|----------------|------------------------------------------------|------------------|---------------|-------------|------|-----------|-----|---------|---------|------------------------------|-----------------------------------------------|
|                             | standardisiert | gp100                                          | modifiziert      | IL-2          | subkutan    | III  | palliativ | 185 | Melanom | n.a.    | positiv                      | Schwartzentruber et al., NEJM 2011            |
| <b>lange Peptide</b>        | individuell    | Patienten-individuell                          | mutiert          | Poly-ICLC     | subkutan    | I    | palliativ | 6   | Melanom | positiv | fragl. nach Therapie mit ICI | Ott et al., Nature 2017                       |
|                             | standardisiert | HPV16-E6, HPV16-E7                             | Virusepitope     | Montanide     | subkutan    | II   | kurativ   | 20  | VIN3    | positiv | positiv                      | Kenter et al., NEJM 2009                      |
| <b>RNS</b>                  | individuell    | Patienten-individuell, NY-ESO-1, Tyrosinase    | mutiert, Wildtyp | keine         | intranodal  | I    | palliativ | 13  | Melanom | positiv | fragl. nach Therapie mit ICI | Sahin et al., Nature 2017                     |
|                             | standardisiert | MUC1, CEA, MAGE-A1, HER2, Survivin, Telomerase | Wildtyp          | GM-CSF        | intradermal | I/II | palliativ | 30  | NZK     | positiv | positiv                      | Rittig et al., Oncoimmunology 2015            |
| <b>Autologe Tumorzellen</b> | individuell    | n.a.                                           | alle             | CPG-B, GM-CSF | intradermal | II   | palliativ | 15  | NZK     | wenig   | positiv                      | Koster et al., Cancer Immunol Immunother 2019 |

**Literaturverzeichnis (in alphabetischer Reihenfolge):**

- Butterfield LH et al. (2019). Multiple antigen-engineered DC vaccines with or without IFN $\alpha$  to promote antitumor immunity in melanoma. *J Immunother Cancer*. 7(1):113. doi: 10.1186/s40425-019-0552-x.
- Hilf N et al. (2019). Actively personalized vaccination trial for newly diagnosed glioblastoma. *Nature*. 565(7738):240-245. doi: 10.1038/s41586-018-0810-y.
- Hodi et al. (2010). Improved survival with ipilimumab in patients with metastatic melanoma. *N Engl J Med*. 363(8):711-23. doi: 10.1056/NEJMoa1003466.
- Ito Z et al. (2019). Predicted Markers of Overall Survival in Pancreatic Cancer Patients Receiving Dendritic Cell Vaccinations Targeting WT1. *Oncology*. 97(3):135-148. doi: 10.1159/000500359.
- Kenter GG et al. (2009). Vaccination against HPV-16 oncoproteins for vulvar intraepithelial neoplasia. *N Engl J Med*. 361(19):1838-47. doi: 10.1056/NEJMoa0810097.
- Koster BD et al. (2019). Autologous tumor cell vaccination combined with systemic CpG-B and IFN- $\alpha$  promotes immune activation and induces clinical responses in patients with metastatic renal cell carcinoma: a phase II trial. *Cancer Immunol Immunother*. 68(6):1025-1035. doi: 10.1007/s00262-019-02320-0.
- Mittendorf EA et al. (2012). Clinical trial results of the HER-2/neu (E75) vaccine to prevent breast cancer recurrence in high-risk patients: from US Military Cancer Institute Clinical Trials Group Study I-01 and I-02. *Cancer*. 2012 May 15;118(10):2594-602. doi: 10.1002/cncr.26574.
- Noguchi et al. (2012). Phase II study of personalized peptide vaccination for castration-resistant prostate cancer patients who failed in docetaxel-based chemotherapy. *Prostate*. 72(8):834-45. doi: 10.1002/pros.21485.
- Ott PA et al. (2017). An immunogenic personal neoantigen vaccine for patients with melanoma. *Nature*. 547(7662):217-221. doi: 10.1038/nature22991.
- Rausch S et al. (2019). Results of a Phase 1/2 Study in Metastatic Renal Cell Carcinoma Patients Treated with a Patient-specific Adjuvant Multi-peptide Vaccine after Resection of Metastases. *Eur Urol Focus*. 2019 Jul;5(4):604-607. doi: 10.1016/j.euf.2017.09.009.
- Rini BI et al. (2016). IMA901, a multipeptide cancer vaccine, plus sunitinib versus sunitinib alone, as first-line therapy for advanced or metastatic renal cell carcinoma (IMPRINT): a multicentre, open-label, randomised, controlled, phase 3 trial. *Lancet Oncol*. 17(11):1599-1611. doi: 10.1016/S1470-2045(16)30408-9.
- Rittig SM et al. (2015). Long-term survival correlates with immunological responses in renal cell carcinoma patients treated with mRNA-based immunotherapy. *Oncoimmunology*. 5(5):e1108511. doi: 10.1080/2162402X.2015.1108511.
- Sahin U et al. (2017). Personalized RNA mutanome vaccines mobilize poly-specific therapeutic immunity against cancer. *Nature*. 547(7662):222-226. doi: 10.1038/nature23003.
- Schwartzenuber DJ et al. (2011). gp100 peptide vaccine and interleukin-2 in patients with advanced melanoma. *N Engl J Med*. 364(22):2119-27. doi: 10.1056/NEJMoa1012863.
- Shima et al. (2019). Randomized phase II trial of survivin 2B peptide vaccination for patients with HLA-A24-positive pancreatic adenocarcinoma. *Cancer Sci*. 110(8):2378-2385. doi: 10.1111/cas.14106.
- Walter et al. (2012). Multipeptide immune response to cancer vaccine IMA901 after single-dose cyclophosphamide associates with longer patient survival. *Nat Med*. 18(8):1254-61. doi: 10.1038/nm.2883.
- Westdorp H et al. (2019). Blood-derived dendritic cell vaccinations induce immune responses that correlate with clinical outcome in patients with chemo-naïve castration-resistant prostate cancer. *J Immunother Cancer*. 7(1):302. doi: 10.1186/s40425-019-0787-6.
